# Supplementary material
Source: publisher site journal article supplement (https://www.dovepress.com/article/508170)
Supplement: Supplementary file 1 [file get_supplementary_file.php]

**Supplementary file 1.** **The PRISMA 2020 checklist**

| **Section and Topic** | **Item #** | **Checklist item** | **Location where item is reported** |
| --- | --- | --- | --- |
| **TITLE** | | |  |
| Title | 1 | Identify the report as a systematic review. | 1 |
| **ABSTRACT** | | | 1 |
| Abstract | 2 | See the PRISMA 2020 for Abstracts checklist. |  |
| **INTRODUCTION** | | |  |
| Rationale | 3 | Describe the rationale for the review in the context of existing knowledge. | 2-4 |
| Objectives | 4 | Provide an explicit statement of the objective(s) or question(s) the review addresses. | 4 |
| **METHODS** | | |  |
| Eligibility criteria | 5 | Specify the inclusion and exclusion criteria for the review and how studies were grouped for the syntheses. | 5 |
| Information sources | 6 | Specify all databases, registers, websites, organisations, reference lists and other sources searched or consulted to identify studies. Specify the date when each source was last searched or consulted. | 4 |
| Search strategy | 7 | Present the full search strategies for all databases, registers and websites, including any filters and limits used. | 5 |
| Selection process | 8 | Specify the methods used to decide whether a study met the inclusion criteria of the review, including how many reviewers screened each record and each report retrieved, whether they worked independently, and if applicable, details of automation tools used in the process. | 5 |
| Data collection process | 9 | Specify the methods used to collect data from reports, including how many reviewers collected data from each report, whether they worked independently, any processes for obtaining or confirming data from study investigators, and if applicable, details of automation tools used in the process. | 5-6 |
| Data items | 10a | List and define all outcomes for which data were sought. Specify whether all results that were compatible with each outcome domain in each study were sought (e.g. for all measures, time points, analyses), and if not, the methods used to decide which results to collect. | 7 |
| 10b | List and define all other variables for which data were sought (e.g. participant and intervention characteristics, funding sources). Describe any assumptions made about any missing or unclear information. | NA |
| Study risk of bias assessment | 11 | Specify the methods used to assess risk of bias in the included studies, including details of the tool(s) used, how many reviewers assessed each study and whether they worked independently, and if applicable, details of automation tools used in the process. | 5 |
| Effect measures | 12 | Specify for each outcome the effect measure(s) (e.g. risk ratio, mean difference) used in the synthesis or presentation of results. | NA |
| Synthesis methods | 13a | Describe the processes used to decide which studies were eligible for each synthesis (e.g. tabulating the study intervention characteristics and comparing against the planned groups for each synthesis (item #5)). | 6 |
| 13b | Describe any methods required to prepare the data for presentation or synthesis, such as handling of missing summary statistics, or data conversions. | NA |
| 13c | Describe any methods used to tabulate or visually display results of individual studies and syntheses. | 6 |
| 13d | Describe any methods used to synthesize results and provide a rationale for the choice(s). If meta-analysis was performed, describe the model(s), method(s) to identify the presence and extent of statistical heterogeneity, and software package(s) used. | NA |
| 13e | Describe any methods used to explore possible causes of heterogeneity among study results (e.g. subgroup analysis, meta-regression). | NA |
| 13f | Describe any sensitivity analyses conducted to assess robustness of the synthesized results. | NA |
| Reporting bias assessment | 14 | Describe any methods used to assess risk of bias due to missing results in a synthesis (arising from reporting biases). | NA |
| Certainty assessment | 15 | Describe any methods used to assess certainty (or confidence) in the body of evidence for an outcome. | NA |
| **RESULTS** | | |  |
| Study selection | 16a | Describe the results of the search and selection process, from the number of records identified in the search to the number of studies included in the review, ideally using a flow diagram. | 6 |
| 16b | Cite studies that might appear to meet the inclusion criteria, but which were excluded, and explain why they were excluded. | 6 |
| Study characteristics | 17 | Cite each included study and present its characteristics. | 6-7, Table |
| Risk of bias in studies | 18 | Present assessments of risk of bias for each included study. | 7 |
| Results of individual studies | 19 | For all outcomes, present, for each study: (a) summary statistics for each group (where appropriate) and (b) an effect estimate and its precision (e.g. confidence/credible interval), ideally using structured tables or plots. | 7-15, Table |
| Results of syntheses | 20a | For each synthesis, briefly summarise the characteristics and risk of bias among contributing studies. | 7, Table |
| 20b | Present results of all statistical syntheses conducted. If meta-analysis was done, present for each the summary estimate and its precision (e.g. confidence/credible interval) and measures of statistical heterogeneity. If comparing groups, describe the direction of the effect. | NA |
| 20c | Present results of all investigations of possible causes of heterogeneity among study results. | NA |
| 20d | Present results of all sensitivity analyses conducted to assess the robustness of the synthesized results. | NA |
| Reporting biases | 21 | Present assessments of risk of bias due to missing results (arising from reporting biases) for each synthesis assessed. | NA |
| Certainty of evidence | 22 | Present assessments of certainty (or confidence) in the body of evidence for each outcome assessed. | NA |
| **DISCUSSION** | | |  |
| Discussion | 23a | Provide a general interpretation of the results in the context of other evidence. | 15 |
| 23b | Discuss any limitations of the evidence included in the review. | 17 |
| 23c | Discuss any limitations of the review processes used. | 17 |
| 23d | Discuss implications of the results for practice, policy, and future research. | 17 |
| **OTHER INFORMATION** | | |  |
| Registration and protocol | 24a | Provide registration information for the review, including register name and registration number, or state that the review was not registered. | 4 |
| 24b | Indicate where the review protocol can be accessed, or state that a protocol was not prepared. | 4 |
| 24c | Describe and explain any amendments to information provided at registration or in the protocol. | NA |
| Support | 25 | Describe sources of financial or non-financial support for the review, and the role of the funders or sponsors in the review. | 17 |
| Competing interests | 26 | Declare any competing interests of review authors. | 17 |
| Availability of data, code and other materials | 27 | Report which of the following are publicly available and where they can be found: template data collection forms; data extracted from included studies; data used for all analyses; analytic code; any other materials used in the review. | 17 |

**Supplementary file 2. Keywords used in the search process**

“special nurse” OR “specialist nurse” OR “SN” OR “specialized nurse” OR “nurse specialist” OR “specialty nurse” OR “certified nurse specialist” OR “advanced practice nurse” OR “APN” OR “clinical nurse specialist” OR “advanced nursing practitioner” OR “nurse practitioner” OR “nurse clinician” OR “advanced practice registered nurse” OR “APRN” OR “nurse consultant” OR “expert nurse” OR “specialized nurse practitioner” OR “registered nurse specialist” OR “skilled nurse” OR “NP” OR “clinical nurse consultant” OR “CNS”

AND

drug* OR medicat* OR pharmac* OR “drug” OR “medicines” OR “medicines management” OR “medication management”

AND

“home care” OR “home health care” OR “In-home care” OR “home-based care” OR “Home care services” OR “Home care nursing” OR “home care for seniors” OR “elderly care at home” OR “home care assistance” OR “home health care agencies” OR “home care for older patients” OR “home caregiving”

**Supplementary file 3. The search result**

| **Databases from 2014-2024 (last decade)** | **Total in each database** | **Results after title and abstract reading** | **Results after Full-text reading/ Quality appraisal** |
| --- | --- | --- | --- |
| PubMed (including Medline) | 313 | 50 | 19 |
| Scopus | 140 | 14 | 8 |
| Cinahl | 282 | 10 | 3 |
| Embase | 111 | 4 | 2 |
| ProQuest | 29 | 0 | 0 |
| Manual search/backtracking references | -- | -- | - |
| **Total of databases** | 875 | 78 | 32 |
| **Duplications** | 115 | -- | - |

**Supplementary file 4.** **Quality appraisal of quantitative randomized controlled trials using the Mixed Methods Appraisal Tool (MMAT), version 2018**

|  | **Quantitative - RCT** | | | | | **Quantitative – Non-randomized** | | | | | **Quantitative - descriptive** | | | | | | **Mixed Methods** | | | | | | **Qualitative** | | | | | |
| --- | --- | --- | --- | --- | --- | --- | --- | --- | --- | --- | --- | --- | --- | --- | --- | --- | --- | --- | --- | --- | --- | --- | --- | --- | --- | --- | --- | --- |
| Authors, Year (classified based on the study type) | Is randomization appropriately performed? | Are the groups comparable at baseline? | Are there complete outcome data? | Are outcome assessors blinded to the intervention provided? | Did the participants adhere to the assigned intervention? | Are the participants representative of the target population? | Are measurements appropriate regarding both the outcome and intervention (or exposure)? | Are there complete outcome data? | Are the confounders accounted for in the design and analysis? | During the study period, is the intervention administered (or exposure occurred) as intended? | Is the sampling strategy relevant to address the research question? | Is the sample representative of the target population? | Are the measurements appropriate? | Is the risk of nonresponse bias low? | Is the statistical analysis appropriate to answer the research question? | Is there an adequate rationale for using a mixed methods design to address the research question? | | Are the different components of the study effectively integrated to answer the research question? | Are the outputs of the integration of qualitative and quantitative components adequately interpreted? | Are divergences and inconsistencies between quantitative and qualitative results adequately addressed? | Do the different components of the study adhere to the quality criteria of each tradition of the methods involved? | Is the qualitative approach appropriate to answer the research question? | | Are the qualitative data collection methods adequate to address the research question? | Are the findings adequately derived from the data? | Is the interpretation of results sufficiently substantiated by data? | Is there coherence between qualitative data sources, collection, analysis and interpretation? |
| Campling et al., 2022 33 |  |  |  |  |  |  |  |  |  |  |  |  |  |  |  | Y | | Y | Y | Y | Y |  | |  |  |  |  |
| Leask, Tennant, 2019 56 |  |  |  |  |  |  |  |  |  |  |  |  |  |  |  | Y | | Y | Y | Y | Y |  | |  |  |  |  |
| Datta et al., 2024 35 |  |  |  |  |  |  |  |  |  |  |  |  |  |  |  |  | |  |  |  |  | Y | | Y | Y | Y | Y |
| Frain et al., 2021 60 |  |  |  |  |  |  |  |  |  |  |  |  |  |  |  |  | |  |  |  |  | Y | | Y | Y | Y | Y |
| Hernandez, 2017 41 |  |  |  |  |  |  |  |  |  |  |  |  |  |  |  |  | |  |  |  |  | Y | | Y | Y | Y | Y |
| Lee at al., 2022 62 |  |  |  |  |  |  |  |  |  |  |  |  |  |  |  |  | |  |  |  |  | Y | | Y | Y | Y | Y |
| Squires et al., 2020 50 |  |  |  |  |  |  |  |  |  |  |  |  |  |  |  |  | |  |  |  |  | Y | | Y | Y | Y | Y |
| Chan et al., 2015 34 | Y | Y | Y | Y | Y |  |  |  |  |  |  |  |  |  |  |  | |  |  |  |  |  | |  |  |  |  |
| Goldman et al., 2014 38 | Y | Y | Y | Y | Y |  |  |  |  |  |  |  |  |  |  |  | |  |  |  |  |  | |  |  |  |  |
| Possin et al., 2019 47 | Y | Y | Y | Y | Y |  |  |  |  |  |  |  |  |  |  |  | |  |  |  |  |  | |  |  |  |  |
| Bagchi et al., 2018 32 |  |  |  |  |  | Y | Y | Y | Y | Y |  |  |  |  |  |  | |  |  |  |  |  | |  |  |  |  |
| Edge et al., 2019 57 |  |  |  |  |  | Y | Y | Y | Y | Y |  |  |  |  |  |  | |  |  |  |  |  | |  |  |  |  |
| Ernecoff et al., 2021 36 |  |  |  |  |  | Y | Y | Y | Y | Y |  |  |  |  |  |  | |  |  |  |  |  | |  |  |  |  |
| Fisher et al., 2019 37 |  |  |  |  |  | Y | Y | Y | Y | Y |  |  |  |  |  |  | |  |  |  |  |  | |  |  |  |  |
| Hall et al., 2014 40 |  |  |  |  |  | Y | Y | Y | Y | Y |  |  |  |  |  |  | |  |  |  |  |  | |  |  |  |  |
| Guo et al., 2020 39 |  |  |  |  |  | Y | Y | Y | Y | Y |  |  |  |  |  |  | |  |  |  |  |  | |  |  |  |  |
| Kanne et al., 2023 42 |  |  |  |  |  | Y | Y | Y | Y | Y |  |  |  |  |  |  | |  |  |  |  |  | |  |  |  |  |
| Kulsick et al., 2020 43 |  |  |  |  |  | Y | Y | Y | Y | Y |  |  |  |  |  |  | |  |  |  |  |  | |  |  |  |  |
| Misra-Hebert et al., 2021 45 |  |  |  |  |  | Y | Y | Y | Y | Y |  |  |  |  |  |  | |  |  |  |  |  | |  |  |  |  |
| Mitchell et al., 2016 52 |  |  |  |  |  | Y | Y | Y | Y | Y |  |  |  |  |  |  | |  |  |  |  |  | |  |  |  |  |
| Moore, 2016 46 |  |  |  |  |  | Y | Y | Y | Y | Y |  |  |  |  |  |  | |  |  |  |  |  | |  |  |  |  |
| Pond et al., 2021 53 |  |  |  |  |  | Y | Y | Y | Y | Y |  |  |  |  |  |  | |  |  |  |  |  | |  |  |  |  |
| Rose et al., 2021 49 |  |  |  |  |  | Y | Y | Y | Y | Y |  |  |  |  |  |  | |  |  |  |  |  | |  |  |  |  |
| Savini et al., 2021 61 |  |  |  |  |  | Y | Y | Y | Y | Y |  |  |  |  |  |  | |  |  |  |  |  | |  |  |  |  |
| Scott et al., 2023 58 |  |  |  |  |  | Y | Y | Y | Y | Y |  |  |  |  |  |  | |  |  |  |  |  | |  |  |  |  |
| Van Ramshorst, 2022 63 |  |  |  |  |  | Y | Y | Y | Y | Y |  |  |  |  |  |  | |  |  |  |  |  | |  |  |  |  |
| Warren et al., 2019 51 |  |  |  |  |  | Y | Y | Y | Y | Y |  |  |  |  |  |  | |  |  |  |  |  | |  |  |  |  |
| Wong et al., 2018 59 |  |  |  |  |  | Y | Y | Y | Y | Y |  |  |  |  |  |  | |  |  |  |  |  | |  |  |  |  |
| Antunes et al., 2020 54 |  |  |  |  |  |  |  |  |  |  | Y | Y | Y | Y | Y |  | |  |  |  |  |  | |  |  |  |  |
| Dawson et al., 2018 55 |  |  |  |  |  |  |  |  |  |  | Y | Y | Y | Y | Y |  | |  |  |  |  |  | |  |  |  |  |
| Levine et al., 2021 44 |  |  |  |  |  |  |  |  |  |  | Y | Y | Y | Y | Y |  | |  |  |  |  |  | |  |  |  |  |
| Quist et al., 2016 48 |  |  |  |  |  |  |  |  |  |  | Y | Y | Y | Y | Y |  | |  |  |  |  |  | |  |  |  |  |

1. The risk of bias assessment of randomized controlled trial studies


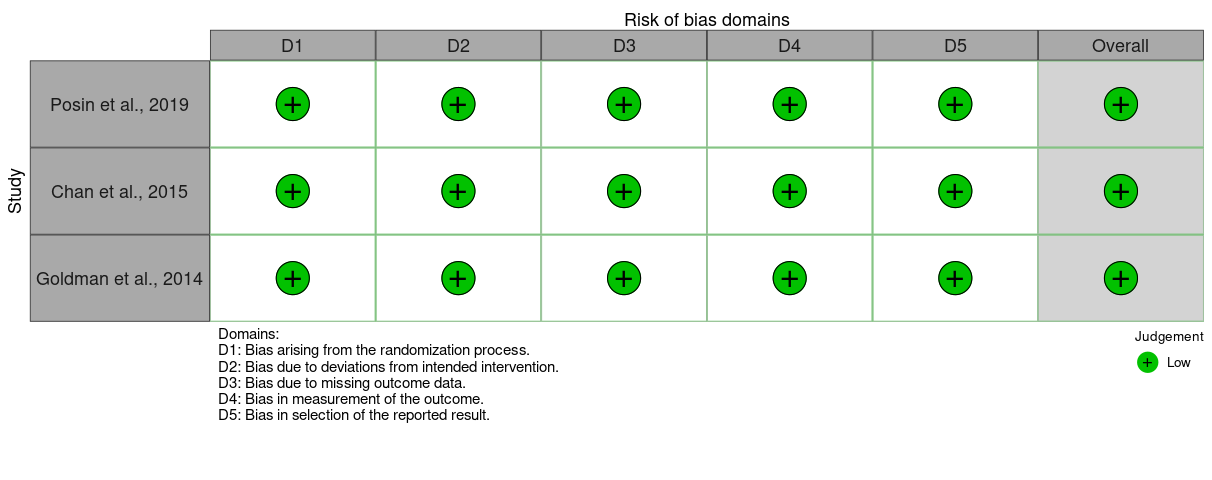


1. Risk of bias assessment of cohort studies


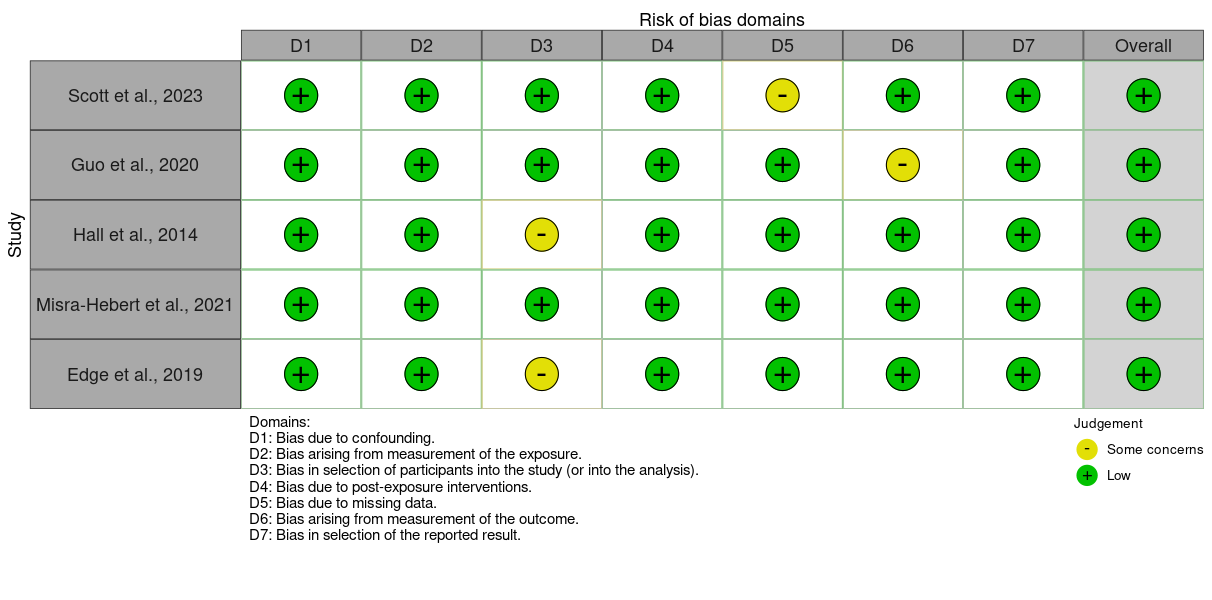


**References**

32. Bagchi A, Melamed B, Yeniyurt S, Holzemer W, Reyes D. Telemedicine delivery for urban seniors with low computer literacy: a pilot study citation. *Online journal of nursing informatics*. 2018;22(2)

33. Campling N, Birtwistle J, Richardson A, et al. Access to palliative care medicines in the community: An evaluation of practice and costs using case studies of service models in England. *Int J Nurs Stud*. Aug 2022;132:104275. doi:10.1016/j.ijnurstu.2022.104275

34. Chan B, Goldman LE, Sarkar U, et al. The Effect of a Care Transition Intervention on the Patient Experience of Older Multi-Lingual Adults in the Safety Net: Results of a Randomized Controlled Trial. *J Gen Intern Med*. Dec 2015;30(12):1788-94. doi:10.1007/s11606-015-3362-y

35. Datta R, Kiwak E, Fried TR, et al. Diagnostic uncertainty and decision-making in home-based primary care: A qualitative study of antibiotic prescribing. *J Am Geriatr Soc*. May 2024;72(5):1468-1475. doi:10.1111/jgs.18778

36. Ernecoff NC, Altieri-Dunn SC, Bilderback A, et al. Evaluation of a Home-Based, Nurse Practitioner-led Advanced Illness Care Program. *J Am Med Dir Assoc*. Nov 2021;22(11):2389-2393. doi:10.1016/j.jamda.2021.05.013

37. Fisher NDL, Fera LE, Dunning JR, et al. Development of an entirely remote, non-physician led hypertension management program. *Clin Cardiol*. Feb 2019;42(2):285-291. doi:10.1002/clc.23141

38. Goldman LE, Sarkar U, Kessell E, et al. Support from hospital to home for elders: a randomized trial. *Ann Intern Med*. Oct 7 2014;161(7):472-81. doi:10.7326/m14-0094

39. Guo F, Lin YL, Raji M, Leonard B, Chou LN, Kuo YF. Processes and outcomes of diabetes mellitus care by different types of team primary care models. *PLoS One*. 2020;15(11):e0241516. doi:10.1371/journal.pone.0241516

40. Hall MH, Esposito RA, Pekmezaris R, et al. Cardiac surgery nurse practitioner home visits prevent coronary artery bypass graft readmissions. *Ann Thorac Surg*. May 2014;97(5):1488-93; discussion 1493-5. doi:10.1016/j.athoracsur.2013.12.049

41. Hernandez J. Medication management in the older adult: A narrative exploration. *J Am Assoc Nurse Pract*. Apr 2017;29(4):186-194. doi:10.1002/2327-6924.12427

42. Kanne GE, McConnell ES, Disco ME, et al. The interagency care team: A new model to integrate social and medical care for older adults in primary care. *Geriatr Nurs*. Mar-Apr 2023;50:72-79. doi:10.1016/j.gerinurse.2022.12.008

43. Kulsick C, Votta J, Wright WL, White P, Strowman S. Enhancing medication adherence in older adults at two nurse practitioner-owned clinics. *J Am Assoc Nurse Pract*. May 6 2020;33(7):553-562. doi:10.1097/jxx.0000000000000414

44. Levine AMP, Emonds EE, Smith MA, et al. Pharmacist Identification of Medication Therapy Problems Involving Cognition Among Older Adults Followed by a Home-Based Care Team. *Drugs Aging*. Feb 2021;38(2):157-168. doi:10.1007/s40266-020-00821-7

45. Misra-Hebert AD, Rothberg MB, Fox J, et al. Healthcare utilization and patient and provider experience with a home visit program for patients discharged from the hospital at high risk for readmission. *Healthc (Amst)*. Mar 2021;9(1):100518. doi:10.1016/j.hjdsi.2020.100518

46. Moore JA. Evaluation of the efficacy of a nurse practitioner-led home-based congestive heart failure clinical pathway. *Home Health Care Serv Q*. Jan-Mar 2016;35(1):39-51. doi:10.1080/01621424.2016.1175992

47. Possin KL, Merrilees JJ, Dulaney S, et al. Effect of Collaborative Dementia Care via Telephone and Internet on Quality of Life, Caregiver Well-being, and Health Care Use: The Care Ecosystem Randomized Clinical Trial. *JAMA Intern Med*. Dec 1 2019;179(12):1658-1667. doi:10.1001/jamainternmed.2019.4101

48. Quist KK, Counsell SR, Schubert CC, Weiner M. Medication management interventions in patients enrolled in GRACE Team Care. *Geriatr Nurs*. Sep-Oct 2016;37(5):371-375. doi:10.1016/j.gerinurse.2016.05.001

49. Rose T, Frith K, Zimmer R. Transitional care following a skilled nursing facility stay: Utilization of nurse practitioners to reduce readmissions in high risk older adults. *Geriatr Nurs*. Nov-Dec 2021;42(6):1594-1596. doi:10.1016/j.gerinurse.2021.06.024

50. Squires A, Ridge L, Miner S, McDonald MV, Greenberg SA, Cortes T. Provider Perspectives of Medication Complexity in Home Health Care: A Qualitative Secondary Data Analysis. *Med Care Res Rev*. Dec 2020;77(6):609-619. doi:10.1177/1077558719828942

51. Warren C, Lemieux AA, Phoenix Bittner N. Excellence in Population Health: A Successful Community-Based Care Transitions Program Model. *Prof Case Manag*. Jan/Feb 2019;24(1):39-45. doi:10.1097/ncm.0000000000000303

52. Mitchell GK, Senior HE, Bibo MP, et al. Evaluation of a pilot of nurse practitioner led, GP supported rural palliative care provision. *BMC Palliat Care*. Nov 9 2016;15(1):93. doi:10.1186/s12904-016-0163-y

53. Pond D, Higgins I, Mate K, Merl H, Mills D, McNeil K. Mobile memory clinic: implementing a nurse practitioner-led, collaborative dementia model of care within general practice. *Aust J Prim Health*. Feb 2021;27(1):6-12. doi:10.1071/py20118

54. Antunes B, Bowers B, Winterburn I, et al. Anticipatory prescribing in community end-of-life care in the UK and Ireland during the COVID-19 pandemic: online survey. *BMJ Support Palliat Care*. Sep 2020;10(3):343-349. doi:10.1136/bmjspcare-2020-002394

55. Dawson A, Reddecliffe S, Coghlan C, Schreiber BE, Coghlan JG. Safety and feasibility audit of a home-based drug-transitioning approach for patients with pulmonary arterial hypertension: an observational study. *Eur J Cardiovasc Nurs*. Oct 2018;17(7):612-618. doi:10.1177/1474515118769534

56. Leask CF, Tennant H. Evaluation of an unscheduled care model delivered by advanced nurse practitioners in a primary-care setting. *J Res Nurs*. Dec 2019;24(8):696-709. doi:10.1177/1744987119852380

57. Edge DS, Tranmer JE, Wei X, VanDenKerkhof EG. A population profile of older adults with prescription encounters with nurse practitioners and family physicians in Ontario: a descriptive retrospective cohort study. *CMAJ Open*. Apr-Jun 2019;7(2):E323-e332. doi:10.9778/cmajo.20190007

58. Scott MM, Ramzy A, Isenberg SR, et al. Nurse practitioner and physician end-of-life home visits and end-of-life outcomes. *BMJ Support Palliat Care*. Nov 18 2023;doi:10.1136/spcare-2023-004392

59. Wong S, Montoya L, Quinlan B. Transitional care post TAVI: A pilot initiative focused on bridging gaps and improving outcomes. *Geriatr Nurs*. Sep-Oct 2018;39(5):548-553. doi:10.1016/j.gerinurse.2018.03.003

60. Frain S, Chambers L, Higgins A, Donohue G. 'Not Left in Limbo': Service User Experiences of Mental Health Nurse Prescribing in Home Care Settings. *Issues Ment Health Nurs*. Jul 2021;42(7):660-666. doi:10.1080/01612840.2020.1820120

61. Savini S, Iovino P, Monaco D, et al. A family nurse-led intervention for reducing health services' utilization in individuals with chronic diseases: The ADVICE pilot study. *Int J Nurs Sci*. Jul 10 2021;8(3):264-270. doi:10.1016/j.ijnss.2021.05.001

62. Lee S, Lee JY, Kim H, Lee K, Lee T. Advanced Practice Nurses' Experiences on Patient Safety Culture in Hospital-Based Home Healthcare: A Qualitative Descriptive Study. *Risk Manag Healthc Policy*. 2022;15:2297-2309. doi:10.2147/rmhp.S388902

63. van Ramshorst J, Duffels M, de Boer SPM, et al. Connected care for endocarditis and heart failure patients: a hospital-at-home programme. *Neth Heart J*. Jun 2022;30(6):319-327. doi:10.1007/s12471-021-01614-2
